# Supplementary material for: Facile fabrication of tea tree oil-loaded antibacterial microcapsules by complex coacervation of sodium alginate/quaternary ammonium salt of chitosan
Source: Royal Society of Chemistry journal article supplement (doi:10.1039/c5ra26052c), 2016-01-01
Supplement: c5ra26052c1.pdf [file c5ra26052c1.pdf]

## Supporting Information

### **Facile Fabrication of Tea Tree Oil-Loaded Antibacterial Microcapsules by Complex Coacervation of Sodium Alginate/Quaternary Ammonium Salt of Chitosan**

Minjie Chen<sup>1</sup>, Yang Hu<sup>1,\*</sup>, Jian Zhou<sup>1</sup>, Yirong Xie<sup>1</sup>, Hong Wu<sup>2</sup>, Teng Yuan<sup>1</sup>,  
Zhuohong Yang<sup>1,\*</sup>

*<sup>1</sup>Institute of Biomaterials, College of Materials and Energy, South China Agriculture  
University, Guangzhou 510642, China*

*<sup>2</sup>College of Life Sciences, South China Agriculture University, Guangzhou 510642, China*

\* Corresponding author

Yang Hu, Zhuohong Yang

Institute of Biomaterials,

College of Materials and Energy,

South China Agriculture University,

Guangzhou 510642, China

Tel.: +86 020 85280325

E-mail address: huyang0303@scau.edu.cn (Y. Hu),

yangzhuohong@qaliyun.com (Z. Yang)

**Table S1.** The independent variable and response value for the optimization of TTO-loaded microcapsules by using Box-Benhnken central composite design.

| Treatment<br>No. <sup>a</sup> | X <sub>1</sub> <sup>b</sup> | X <sub>2</sub> | X <sub>3</sub>                                | Response variable          |                |
|-------------------------------|-----------------------------|----------------|-----------------------------------------------|----------------------------|----------------|
|                               | Core-wall<br>ratio (wt%)    | pH value       | Concentration of<br>CaCl <sub>2</sub> (w/v %) | Actual EE (%)              | Predict EE (%) |
| 1                             | 0 <sup>c</sup> (1:1)        | 0 (6)          | 0 (0.6)                                       | 65.36 (±0.70) <sup>d</sup> | 66.06          |
| 2                             | 0 (1:1)                     | 1 (7)          | -1 (0.3)                                      | 47.08 (±0.23)              | 47.31          |
| 3                             | 0 (1:1)                     | 1 (7)          | 1 (0.9)                                       | 52.46 (±1.06)              | 51.40          |
| 4                             | 1 (3:2)                     | 0 (6)          | 1 (0.9)                                       | 49.28 (±0.04)              | 49.32          |
| 5                             | 0 (1:1)                     | 0 (6)          | 0 (0.6)                                       | 68.21 (±2.15)              | 66.06          |
| 6                             | 0 (1:1)                     | -1 (5)         | -1 (0.3)                                      | 49.55 (±1.06)              | 50.61          |
| 7                             | -1 (1:2)                    | -1 (5)         | 0 (0.6)                                       | 54.67 (±1.02)              | 53.65          |
| 8                             | 0 (1:1)                     | 0 (6)          | 0 (0.6)                                       | 67.72 (±1.66)              | 66.06          |
| 9                             | 0 (1:1)                     | -1 (5)         | 1 (0.9)                                       | 56.37 (±0.23)              | 56.14          |
| 10                            | -1 (1:2)                    | 0 (6)          | 1 (0.9)                                       | 53.04 (±1.25)              | 54.29          |
| 11                            | 0 (1:1)                     | 0 (6)          | 0 (0.6)                                       | 63.53 (±2.53)              | 66.06          |
| 12                            | 0 (1:1)                     | 0 (6)          | 0 (0.6)                                       | 65.48 (±0.58)              | 66.06          |
| 13                            | -1 (1:2)                    | 1 (7)          | 0 (0.6)                                       | 48.28 (±0.19)              | 48.09          |
| 14                            | 1 (3:2)                     | -1 (5)         | 0 (0.6)                                       | 46.14 (±0.19)              | 46.33          |
| 15                            | 1 (3:2)                     | 1 (7)          | 0 (0.6)                                       | 42.83 (±1.02)              | 43.85          |
| 16                            | 1 (3:2)                     | 0 (6)          | -1 (0.3)                                      | 44.95 (±1.25)              | 43.70          |
| 17                            | -1 (1:2)                    | 0 (6)          | -1 (0.3)                                      | 50.33 (±0.04)              | 50.29          |

<sup>a</sup> The treatment were run as a stochastic order.

<sup>b</sup> The factors (X<sub>1</sub>), (X<sub>2</sub>) and (X<sub>3</sub>) are variables.

<sup>c</sup> The values (-1), (0) and (1) are coded levels.

<sup>d</sup> The residual is actual encapsulation efficiency versus predict encapsulation efficiency.

**Table S2.** Analysis of variance of the regression parameters for TTO-loaded microcapsules.

| Source                        | Sum of squares | Df | Mean square | F-value | p-value Prob > F |
|-------------------------------|----------------|----|-------------|---------|------------------|
| Model                         | 1130.43        | 9  | 125.60      | 39.53   | < 0.0001 ***     |
| X <sub>1</sub>                | 66.82          | 1  | 66.82       | 21.03   | 0.0025 **        |
| X <sub>2</sub>                | 32.32          | 1  | 66.82       | 10.17   | 0.0153 *         |
| X <sub>3</sub>                | 46.27          | 1  | 46.27       | 14.56   | 0.0066 **        |
| X <sub>1</sub> X <sub>2</sub> | 2.37           | 1  | 2.37        | 0.75    | 0.4162 #         |
| X <sub>1</sub> X <sub>3</sub> | 0.66           | 1  | 0.66        | 0.21    | 0.6633 #         |
| X <sub>2</sub> X <sub>3</sub> | 0.52           | 1  | 0.52        | 0.16    | 0.6983 #         |
| X <sub>1</sub> <sup>2</sup>   | 422.95         | 1  | 422.95      | 133.12  | < 0.0001 ***     |
| X <sub>2</sub> <sup>2</sup>   | 273.36         | 1  | 273.36      | 86.04   | < 0.0001 ***     |
| X <sub>3</sub> <sup>2</sup>   | 185.50         | 1  | 185.50      | 58.39   | 0.0001 ***       |
| Residual                      | 22.24          | 7  | 3.18        |         |                  |
| Lack of Fit                   | 7.63           | 3  | 2.54        | 0.70    | 0.6008 #         |
| Pure Error                    | 14.61          | 4  | 3.65        |         |                  |
| Cor Total                     | 1152.67        | 16 |             |         |                  |
| R <sup>2</sup>                |                |    |             |         | 0.9807           |
| Adj R <sup>2</sup>            |                |    |             |         | 0.9559           |
| Pred R <sup>2</sup>           |                |    |             |         | 0.8742           |
| Adeq Precision                |                |    |             |         | 16.356           |

\*, \*\*, \*\*\* and # indicate significant (P < 0.05), highly significant (P < 0.01), top significant (P < 0.001) and not significant, respectively.

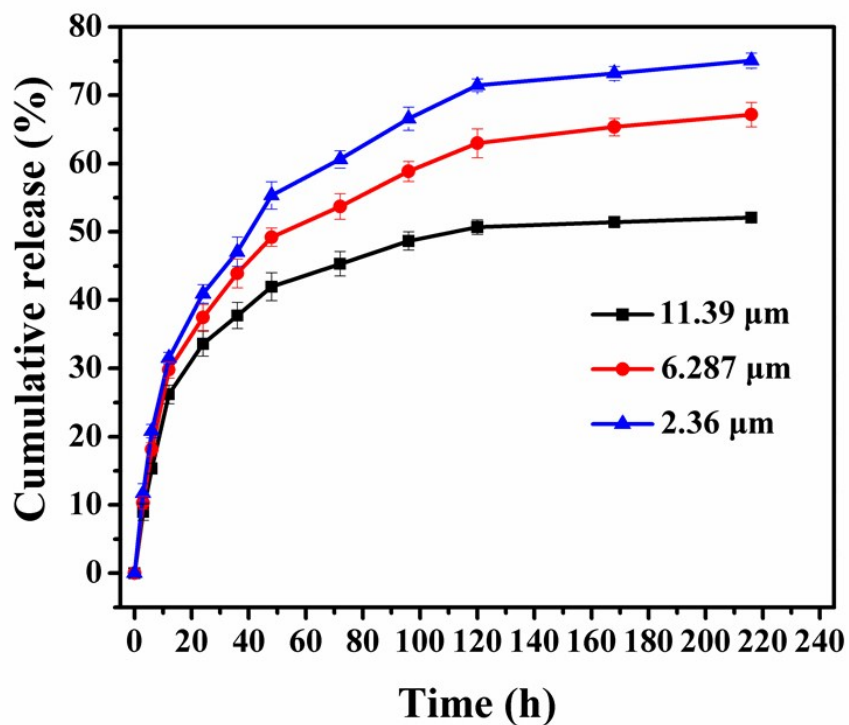

**Fig. S1.** In vitro release profiles of TTO from the TTO-loaded microcapsules with different sizes.

The TTO-loaded microcapsules with different sizes (2.36  $\mu\text{m}$ , 6.287  $\mu\text{m}$  and 11.39  $\mu\text{m}$ ) were successfully prepared by various shearing velocity. And then the in vitro TTO release studies were implemented according to the means of 2.6 in the manuscript.

**Table S3.** The results of fitting the TTO release profiles by different kinetic models.

| Test number    | Kinetic models     |       |         |                             |         |         |                           |       |         |                     |       |         |        |
|----------------|--------------------|-------|---------|-----------------------------|---------|---------|---------------------------|-------|---------|---------------------|-------|---------|--------|
|                | Zero-order         |       |         | First-order                 |         |         | Higuchi                   |       |         | Rigter-Peppas       |       |         |        |
|                | $Q_t = K_0t + C_0$ |       |         | $\ln(100-Q_t) = K_1t + C_1$ |         |         | $Q_t = K_H t^{1/2} + C_H$ |       |         | $Q_t = K_p t^{n_p}$ |       |         |        |
|                | $K_0$              | $C_0$ | $R_0^2$ | $K_1$                       | $C_1$   | $R_1^2$ | $K_H$                     | $C_H$ | $R_H^2$ | $K_p$               | $n_p$ | $R_p^2$ |        |
| T <sup>a</sup> | 4°C                | 0.15  | 17.40   | 0.7257                      | -0.0021 | 4.41    | 0.7767                    | 2.75  | 7.78    | 0.8968              | 1.57  | 0.44    | 0.9101 |
|                | 25°C               | 0.19  | 24.05   | 0.7252                      | -0.0032 | 4.33    | 0.8020                    | 3.56  | 11.59   | 0.8965              | 2.01  | 0.41    | 0.9286 |
|                | 37°C               | 0.24  | 28.01   | 0.7408                      | -0.0045 | 4.28    | 0.8431                    | 4.28  | 13.09   | 0.9069              | 2.17  | 0.42    | 0.9371 |
| H <sup>b</sup> | 24%                | 0.24  | 28.01   | 0.7408                      | -0.0045 | 4.28    | 0.8431                    | 4.28  | 13.09   | 0.9069              | 2.17  | 0.42    | 0.9371 |
|                | 35%                | 0.27  | 33.49   | 0.7027                      | -0.0061 | 4.19    | 0.8248                    | 4.92  | 16.10   | 0.8818              | 3.36  | 0.40    | 0.9383 |
|                | 50%                | 0.29  | 39.09   | 0.6892                      | -0.0088 | 4.11    | 0.8453                    | 5.54  | 19.42   | 0.8730              | 2.53  | 0.39    | 0.9398 |

T<sup>a</sup>: The environmental temperature; H<sup>b</sup>: the environmental humidity;

$Q_t$ : The % cumulative release rate of tea tree oil from the microcapsules at time t;

$K_0, C_0, K_1, C_1, K_H, C_H, K_p$ : Constants of the corresponding kinetic models;

$n_p$ : The diffusion index of Rigter-Peppas models: Fickian diffusion ( $n_p \leq 0.45$ ), non Fickian diffusion ( $0.45 < n_p < 0.89$ ) or matrix erosion diffusion ( $n_p \geq 0.89$ );

$R_0^2, R_1^2, R_H^2, R_p^2$ : Correlation coefficients of the corresponding kinetic models.
